# Supplementary material for: Reexpression of Let-7g MicroRNA Inhibits the Proliferation and Migration via K-Ras/HMGA2/Snail Axis in Hepatocellular Carcinoma
Source: Hindawi journal article supplement (doi:10.1155/2014/742417), 2014-01-01

## Supplementary

**Table 1. Primers used for quantitative RT-PCR.**

| <b>Primers</b> | <b>Sequences</b>       |
|----------------|------------------------|
| U6 forward     | ctcgcttcggcagcaca      |
| U6 reverse     | aactcttcactaatttgcctg  |
| let-7a         | tgaggtagtagggtgtatagtt |
| let-7b         | tgaggtagtagggtgtgtggtt |
| let-7c         | tgaggtagtagggtgtatggtt |
| let-7d         | agaggtagtagggtgcatagtt |
| let-7e         | tgaggtaggagggtgtatagtt |
| let-7f         | tgaggtagtagattgtatagtt |
| let-7g         | tgaggtagttgtacagtt     |

Figure 1

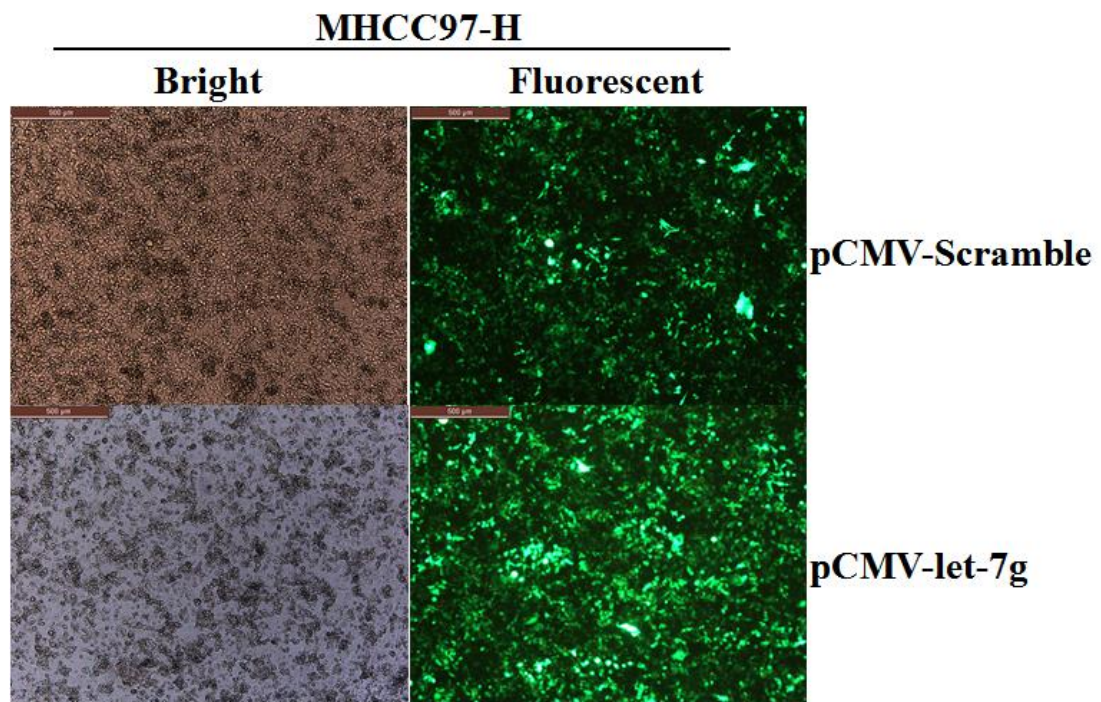

Figure 2

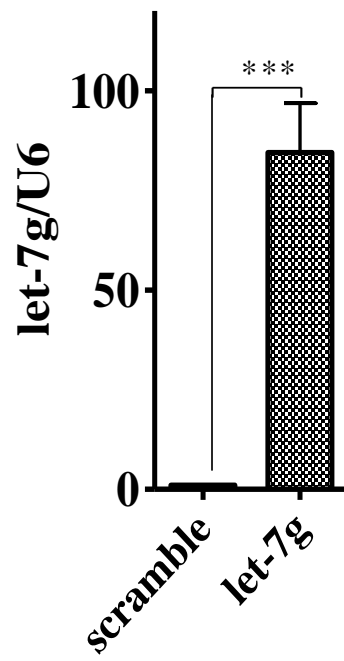

Supplement: f1 [file 742417.f1.pdf]
